# Supplementary material for: OA-MEN: a fusion deep learning approach for enhanced accuracy in knee osteoarthritis detection and classification using X-Ray imaging
Source: Frontiers journal article supplement (doi:10.3389/fbioe.2024.1437188), 2025-01-03
Supplement: Image_2.pdf [file Image_2.pdf]

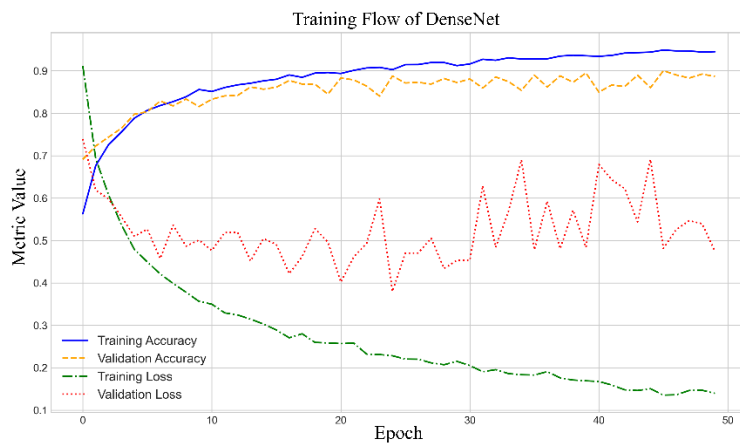

Fig. a. The training flow of DenseNet

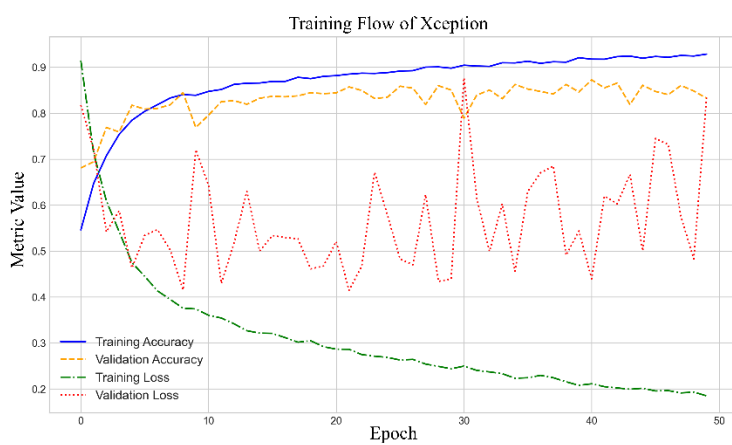

Fig. b. The training flow of Xception

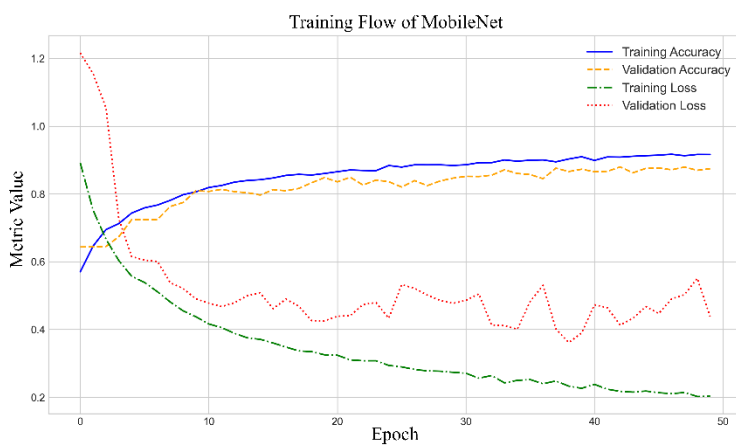

Fig. c. The training flow of MobileNet

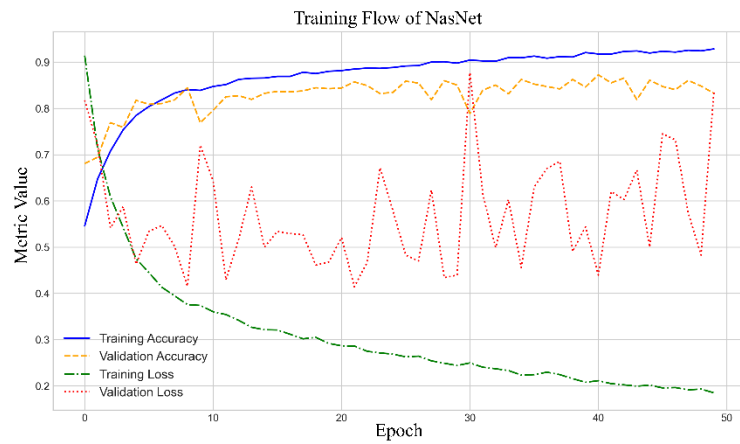

Fig. d. The training flow of NasNet

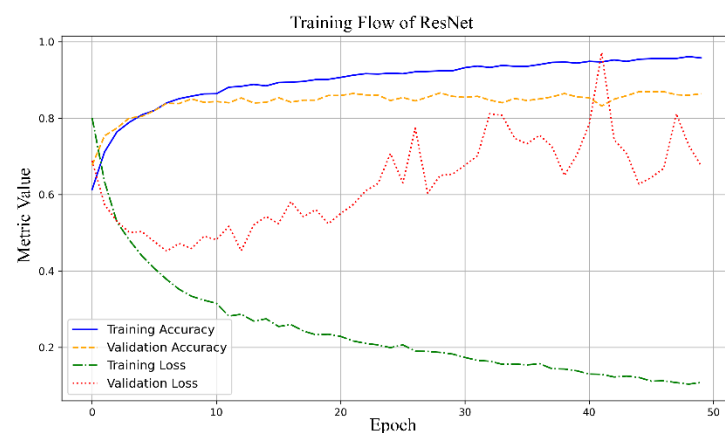

Fig. e. The training flow of ResNet
